# Supplementary material for: Evolution of NO2 levels in Spain from 1996 to 2012
Source: PubMed Central journal article supplement (PMC4115208; doi:10.1038/srep05887), 2014-07-30
Supplement: srep05887-s1.pdf [file srep05887-s1.pdf]

## Evolution of NO<sub>2</sub> levels in Spain from 1996 to 2012

Carlos A. Cuevas, Alberto Notario, José Antonio Adame, Andreas Hilboll,

Andreas Richter, John P. Burrows and Alfonso Saiz-Lopez

### Supplementary information

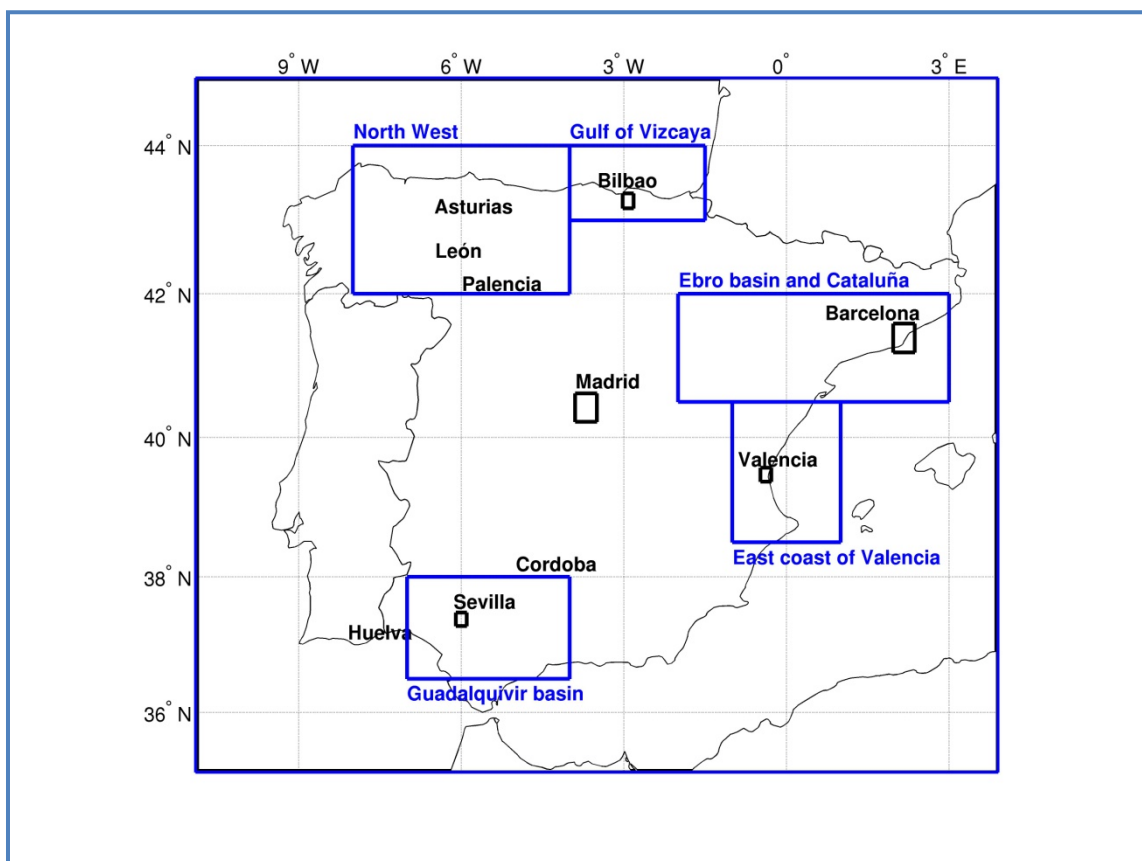

**Figure S1.** Map of the Iberian Peninsula including the location of the regions (Blue), the studied cities and the rest of places cited in the main text. Figure created by the authors using Matlab R213a

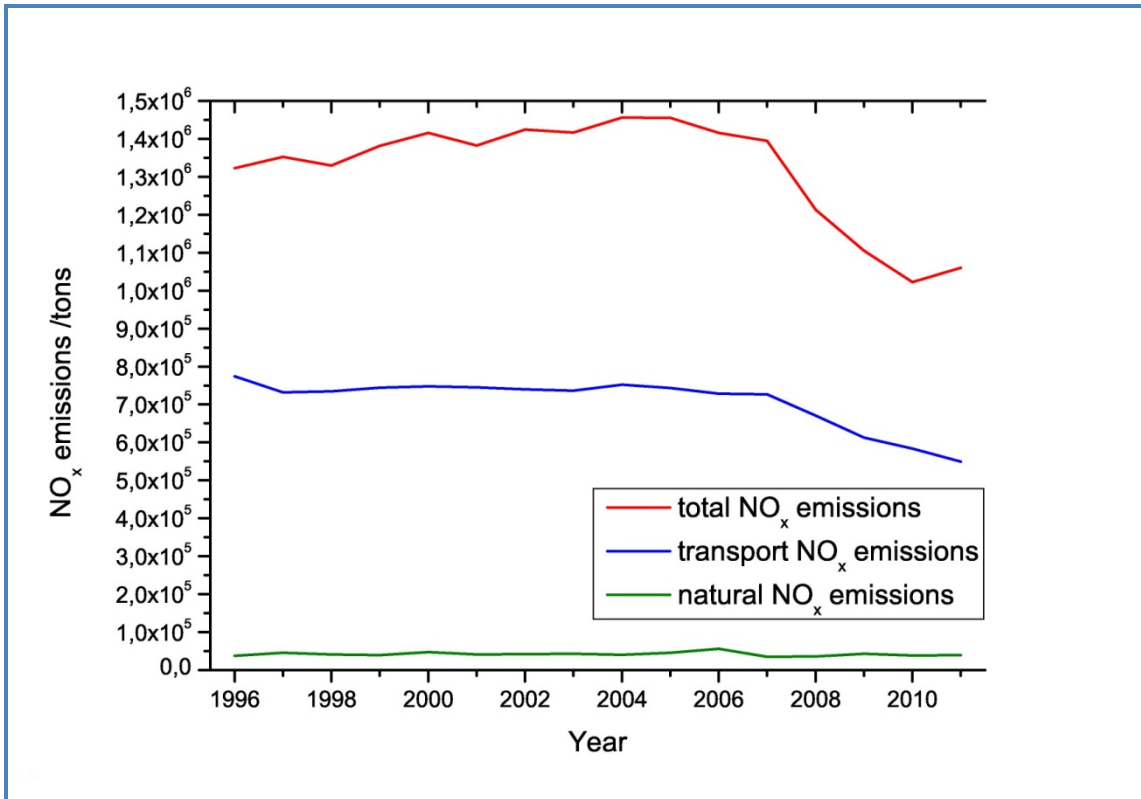

**Figure S2.** Spanish national emissions (MAGRAMA)<sup>1</sup> of NO<sub>x</sub>.

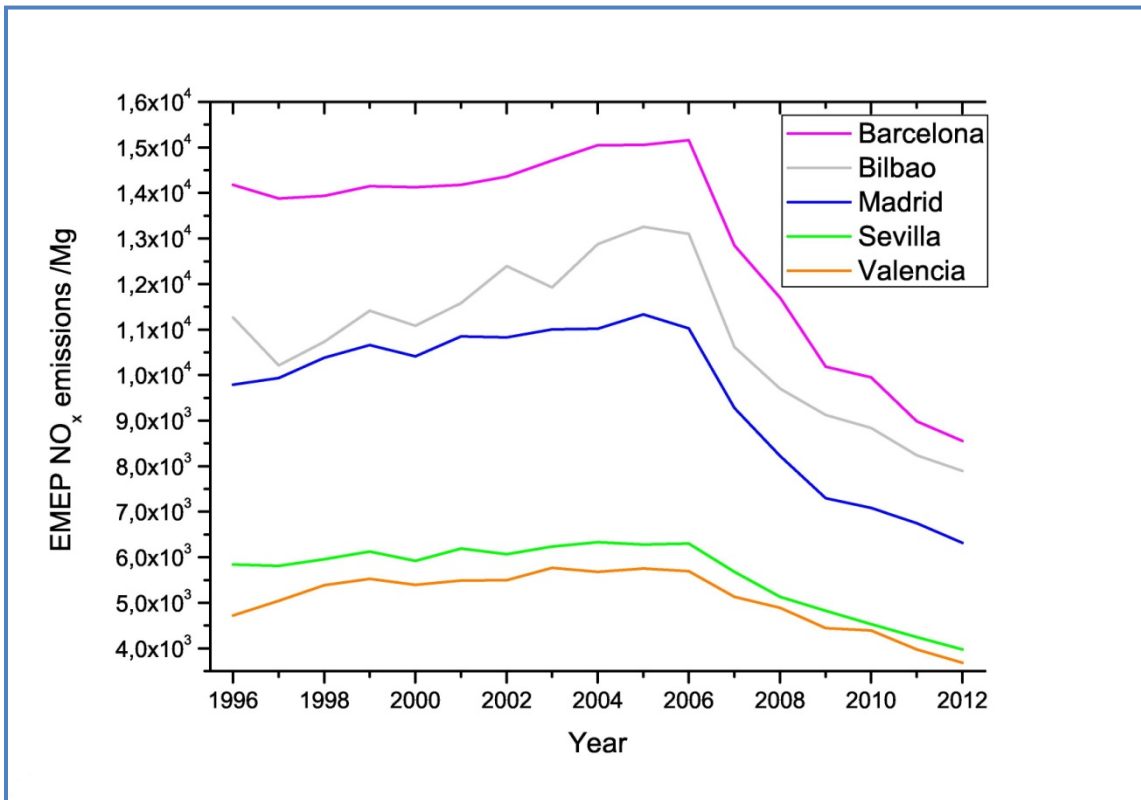

**Figure S3.** Emissions of NO<sub>x</sub> as used in EMEP models for the five cities (CEIP)<sup>2</sup>.

| <b>Geographic zone</b>         | <b>Latitude</b> | <b>Longitude</b> |
|--------------------------------|-----------------|------------------|
| <b>East coast of Valencia</b>  | 38.5 → 40.5     | -1 → 1           |
| <b>Ebro basin and Cataluna</b> | 40.5 → 42       | -2 → 3           |
| <b>Madrid</b>                  | 40.22 → 40.62   | -3.9 → -3.5      |
| <b>Sevilla</b>                 | 37.28 → 37.48   | -6.1 → -5.9      |
| <b>Barcelona</b>               | 41.19 → 41.59   | 1.97 → 2.37      |
| <b>Bilbao</b>                  | 43.16 → 43.36   | -3.02 → -2.82    |
| <b>North-West</b>              | 42 → 44         | -8 → -4          |
| <b>Gulf of Vizcaya</b>         | 43 → 44         | -4 → -1.5        |
| <b>Gualdalquivir basin</b>     | 36.5 → 38       | -7 → -4          |
| <b>Valencia</b>                | 39.37 → 39.57   | -0.48 → -0.28    |
| <b>Spain</b>                   | 36 → 44         | -7 → 0           |
|                                | 42 → 44         | -9.5 → -7        |
|                                | 39 → 43         | 0 → 3.5          |

**Table S1.** Coordinates of geographic zones included in table 1.

| City        | 1996-2012                                    |       | 1996-2008                                    |       | 2008-2012                                    |       |
|-------------|----------------------------------------------|-------|----------------------------------------------|-------|----------------------------------------------|-------|
|             | Slope / $\mu\text{g m}^{-3} \text{ yr}^{-1}$ | Error | Slope / $\mu\text{g m}^{-3} \text{ yr}^{-1}$ | Error | Slope / $\mu\text{g m}^{-3} \text{ yr}^{-1}$ | Error |
| Barcelona   | -0.63*                                       | 0.13  | -0.50                                        | 0.19  | -0.89*                                       | 0.63  |
| Bilbao      | -1.09*                                       | 0.23  | -1.44                                        | 0.31  | -0.79*                                       | 0.47  |
| Madrid      | -1.41                                        | 0.21  | -0.71                                        | 0.14  | -4.31                                        | 0.94  |
| Sevilla     | -1.54**                                      | 0.18  | -1.71**                                      | 0.33  | -1.49                                        | 0.29  |
| Valencia    | -3.18***                                     | 0.23  | -3.07***                                     | 0.42  | -3.89                                        | 0.52  |
| Average**** | -1.48                                        | 0.13  | -1.25                                        | 0.19  | -2.89                                        | 0.39  |

**Table S2.** Slopes from the regression analysis for the different time periods.

\* No data available for 2012.

\*\* No data available for 1996.

\*\*\* No data available for 1996 and 1997.

\*\*\*\* Average of the five cities

## Supplementary information references

- 1 MAGRAMA. Inventario Nacional de Emisiones de Contaminantes a la Atmósfera. Ministerio de Agricultura, Alimentación y Medio Ambiente del Gobierno de España (<http://www.magrama.gob.es/es/calidad-y-evaluacion-ambiental/temas/sistema-espanol-de-inventario-sei-/>). (2014, Date of access: 6/06/2014).
- 2 CEIP. Centre on Emission Inventories and Projections. (<http://www.ceip.at/>). (2014, Date of access: 8/07/2014).
